# Supplementary material for: Streamlining gene expression analysis: integration of co-culture and mRNA purification
Source: Royal Society of Chemistry journal article supplement (doi:10.1039/c3ib40136g), 2013-12-05
Supplement: c3ib40136g.pdf [file c3ib40136g.pdf]

## Supplemental Information

### Streamlining Gene Expression Analysis: Integration of Co-Culture and mRNA Purification

Scott M. Berry<sup>1,2</sup>, Chandresh Singh<sup>1,2</sup>, Jessica D. Lang<sup>2,3</sup>, Lindsay N. Strotman<sup>1,2</sup>, Elaine T. Alarid<sup>2,3</sup>, and David J. Beebe<sup>1,2</sup>

Departments of Biomedical Engineering<sup>1</sup>, The Carbone Cancer Center<sup>2</sup>, and Oncology<sup>3</sup>, University of Wisconsin-Madison

Supplemental Information Table of Contents:

Table S-1 – PCR primers and annealing temperatures

Table S-1 – PCR primers and annealing temperatures. PCR reactions were run for 40 cycles of 95° C for 15 seconds and the annealing temperature given here for 60 seconds.

| Gene        | Forward Primer         | Reverse Primer         | Annealing Temp. |
|-------------|------------------------|------------------------|-----------------|
| RPLP0       | GACAATGGCAGCATCTACAAC  | GCAGACAGACACTGGCAAC    | 60° C           |
| eGFP        | CATCTTCTTCAAGGACGAC    | TTGTGGCTGTTGTAGTTG     | 60° C           |
| Vimentin    | ACACCCTGCAATCTTTCAGACA | GATTCCACTTTGCGTTCAAGGT | 60° C           |
| ER $\alpha$ | CCTGATGATTGGTCTCGTCTG  | GGCACACAAACTCCTCTCC    | 57° C           |
